# Supplementary material
Source: MDPI journal article supplement (https://www.mdpi.com/2073-4441/14/20/3314)
Supplement: s1 [file s1]

Supplementary data for

**Long-term performance of cement stabilized/solidified Pb contaminated soil  
under simulated erosive environment**

*Ping Wang<sup>1,2</sup>, Xin Chen<sup>1,2,3</sup>, Zhiwei Dong<sup>1,2</sup>, Shiyu Liu<sup>1,2,5</sup>, Xianwei Zhang<sup>1,2,5</sup>, Ce Wang<sup>1,2</sup>, Gang  
Zeng<sup>4\*</sup>*

1 State Key Laboratory of Geomechanics and Geotechnical Engineering,

Institute of Rock and Soil Mechanics, Chinese Academy of Sciences,

Wuhan 430071, China

2 Hubei province Key Laboratory of contaminated sludge & soil science and Engineering, Wuhan, 430071, China

3 University of Chinese Academy of Sciences, Beijing, China

4 School of Civil Engineering and Architecture, Hubei University of Arts and Science,

Xiangyang 441053, China

5 School of Urban Construction, Wuhan University of Science and Technology, Wuhan 430065, China

Submitted to: Water

**Date: Aug 17, 2022**

**Number of Pages: 4**

**Number of Tables: 2**

**Number of figure: 1**

**Table S1.** Extraction media used in the modified BCR sequential extraction.

| Extraction step | Extraction medium                                                                           | Fraction obtained*        |
|-----------------|---------------------------------------------------------------------------------------------|---------------------------|
| 1               | 0.11 mol/L CH <sub>3</sub> COOH, pH 2.85                                                    | F1, acid soluble fraction |
| 2               | 0.5 mol/L NH <sub>2</sub> OH·HCl, pH 1.5                                                    | F2, reducible fraction    |
| 3               | 8.8 mol/L H <sub>2</sub> O <sub>2</sub> + 1 mol/L CH <sub>3</sub> COONH <sub>4</sub> , pH 2 | F3, oxidizable fraction   |

Note:

\* - The residual fraction (F4) was obtained from total digestion of the final residue after the three extraction steps.

**Table S2.** Model prediction Error Analysis

| <b>Curing time<br/>(d)</b> | <b>pH=5, relative<br/>error<br/>(%)</b> | <b>pH=6.86, relative error<br/>(%)</b> | <b>pH=10, relative<br/>error<br/>(%)</b> |
|----------------------------|-----------------------------------------|----------------------------------------|------------------------------------------|
| <b>1</b>                   | 1.67                                    | 2.78                                   | 0.55                                     |
| <b>7</b>                   | 6.20                                    | 4.41                                   | 3.63                                     |
| <b>15</b>                  | 0.16                                    | 2.22                                   | 4.43                                     |
| <b>28</b>                  | 3.31                                    | 0.04                                   | 2.18                                     |
| <b>60</b>                  | 1.88                                    | 31.46                                  | 31.87                                    |
| <b>90</b>                  | 0.74                                    | 0.07                                   | 1.22                                     |
| <b>150</b>                 | 2.02                                    | 1.53                                   | 0.94                                     |
| <b>360</b>                 | 2.86                                    | 1.19                                   | 1.68                                     |
| <b>450</b>                 | 3.43                                    | 0.95                                   | 3.76                                     |
| <b>720</b>                 | 4.54                                    | 4.00                                   | 6.72                                     |
| <b>1080</b>                | 2.86                                    | 4.97                                   | 7.67                                     |

Supplementary materials:

Based on the principle of least squares, taking the observation data of pH = 5 as an example, the nonlinear fitting function is called to solve the parameters. The matlab program is as follows:

```
function GRDM model
clc
xi=[1,7,15,28,60,90]; % x data
yi=[6.8,9.3,10.6,13.2,15,16.2]; % y data
abc0=[0.05,10,18]; % initial values
abc = lsqcurvefit(@fun, abc,xi,yi)
% target function
function y = fun(abc,x)
y = (-abc(1)*e^(abc(2)x)+ abc(3);
abc =
0.03835  9.9401  16.5138
```

**Figure S1.** Fitting curves of hydraulic conductivity in different scenarios

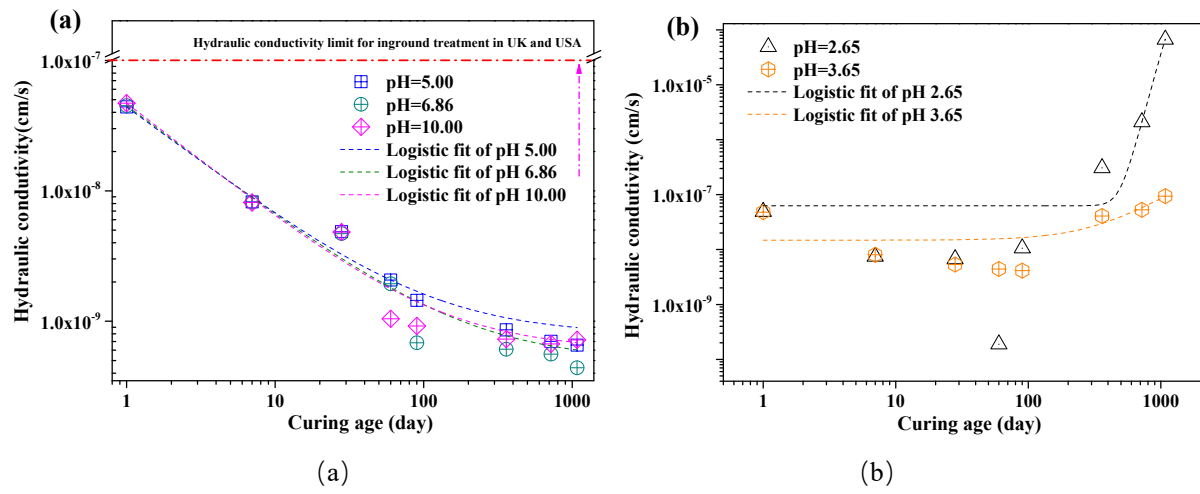

Figure 2-9 Fitting curves of hydraulic conductivity with logistic model: (a) acid condition; (b) weak acid and weak alkaline condition
